# Supplementary material for: Noisy Splicing Drives mRNA Isoform Diversity in Human Cells
Source: PubMed Central journal article supplement (PMC3000347; doi:10.1371/journal.pgen.1001236), 2010-12-09

## Annotated splice sites (liver)

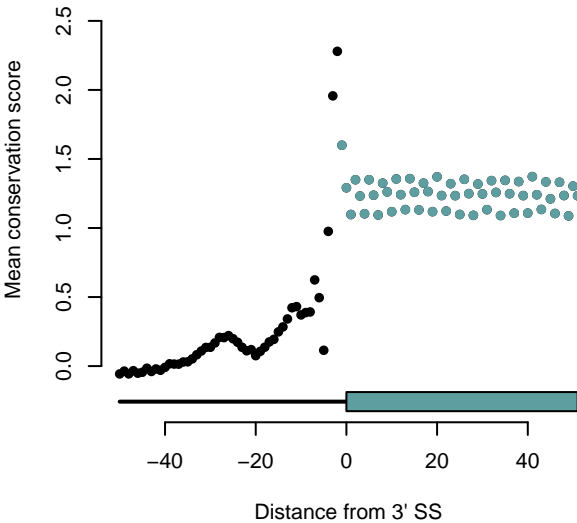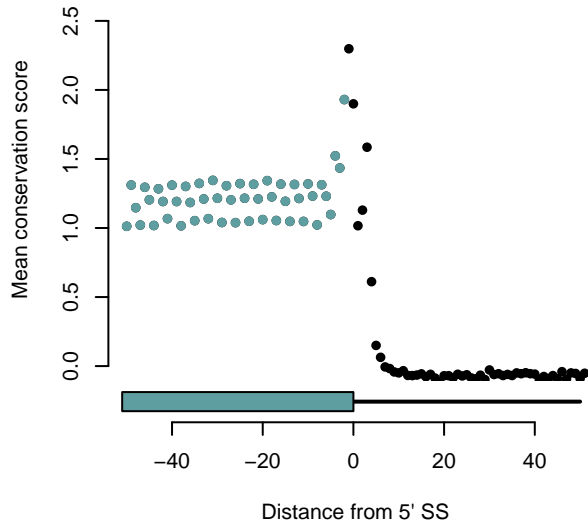

## Unannotated splice sites (liver)

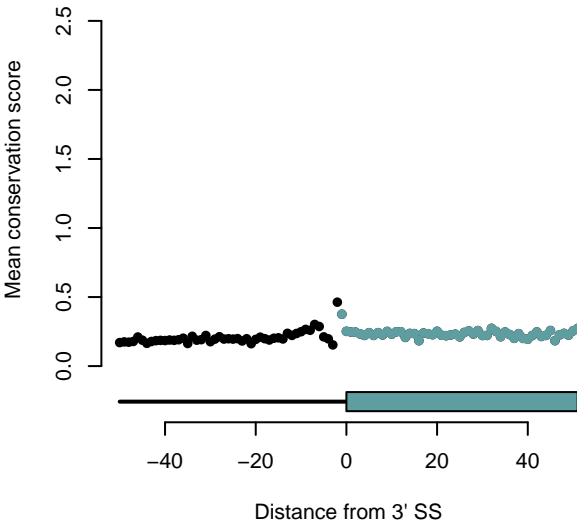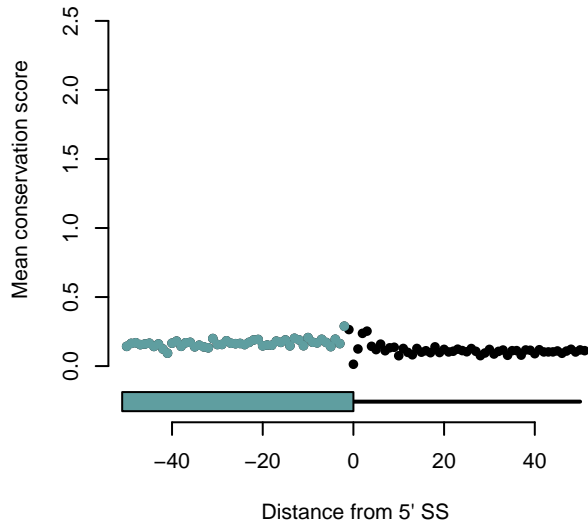

Supplement: pgen.1001236.s002.pdf [file pgen.1001236.s002.pdf]
