# Supplementary material for: Noisy Splicing Drives mRNA Isoform Diversity in Human Cells
Source: PubMed Central journal article supplement (PMC3000347; doi:10.1371/journal.pgen.1001236), 2010-12-09

## Annotated splice sites

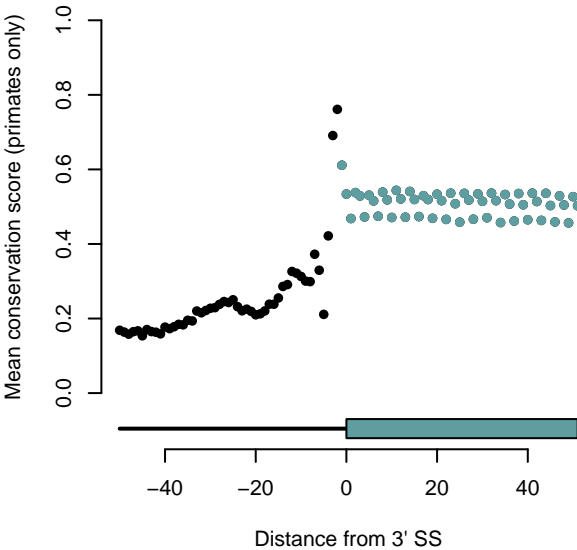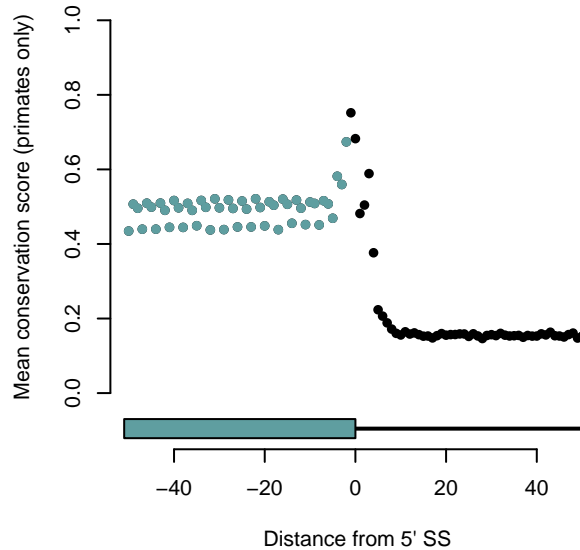

## Unannotated splice sites

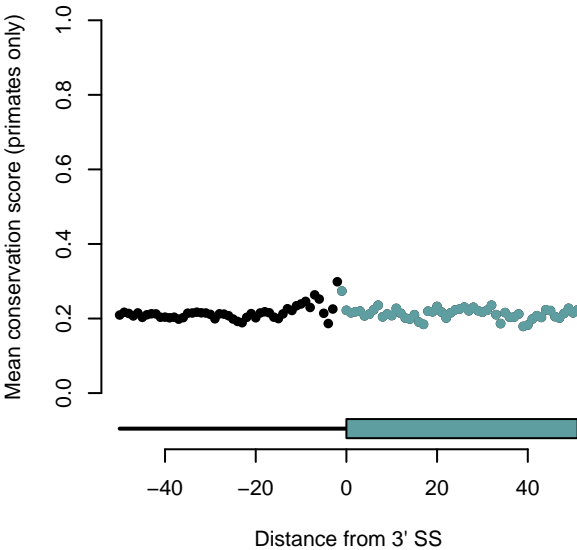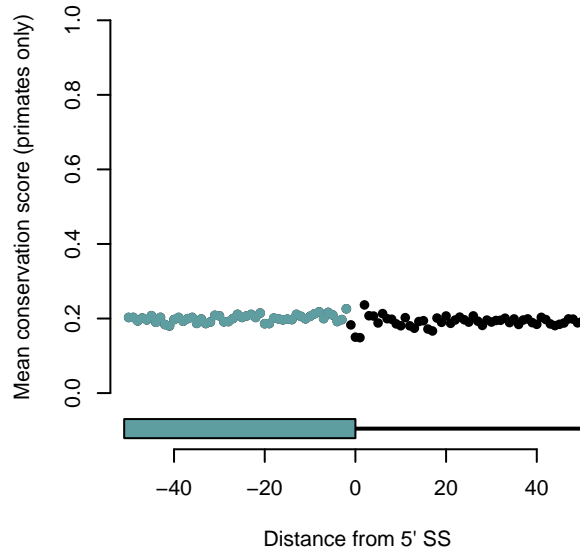

Supplement: pgen.1001236.s004.pdf [file pgen.1001236.s004.pdf]
